# Supplementary material
Source: PubMed Central journal article supplement (PMC10062175)
Supplement: NIHMS1879560-supplement-Supplemental_Figures.pdf [file NIHMS1879560-supplement-Supplemental_Figures.pdf]

Supplemental Information

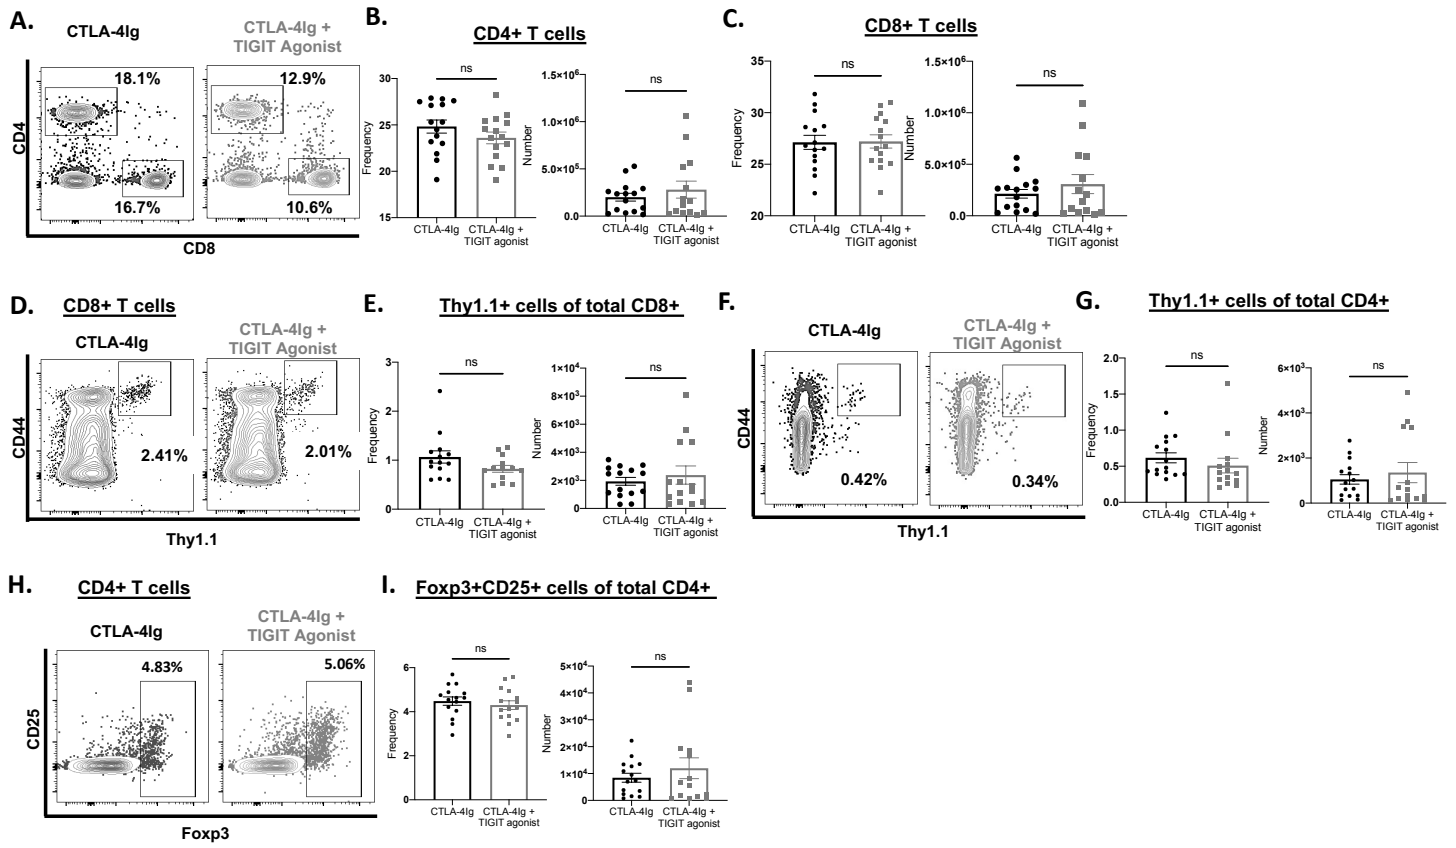

**S1:** Flow cytometric analysis of cells from draining lymph nodes 10 days after OVA graft challenge and treatment with CTLA-4Ig alone or CTLA-4Ig + TIGIT agonist. (A) Example flow and (B, C) summary data of the frequency and number of CD4<sup>+</sup> and CD8<sup>+</sup> T cells within the graft draining lymph nodes. Within the CD8<sup>+</sup>T cell population graft-specific Thy1.1<sup>+</sup> T cells were measured (example flow D, summarized E) as well as the CD4<sup>+</sup> graft-specific Thy1.1<sup>+</sup> from the CD4<sup>+</sup> compartment (example flow F, summarized G). Foxp3<sup>+</sup> regulatory T cells were quantified within the CD4<sup>+</sup> T cell population (example flow H, summarized in I). Experiments are representative of at least 2 independent experiments, mean ± SEM is shown. Non-parametric Mann-Whitney T tests were performed between groups for B and D, one way ANOVA were performed in F, G, I (\*p<0.05, \*\*p<0.01, \*\*\*p<0.001, \*\*\*\*p<0.0001).

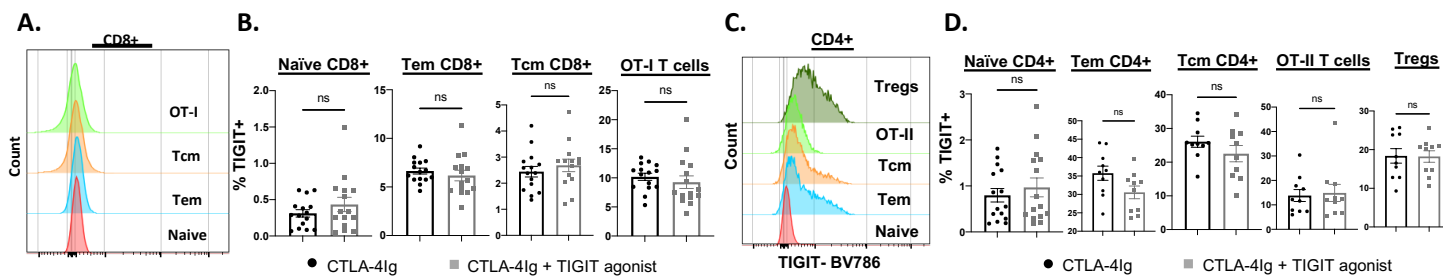

**S2:** (A-D) TIGIT expression on wild type CD8<sup>+</sup> and CD4<sup>+</sup> T cell subsets. CD8<sup>+</sup> T cells from spleens 10 days after allograft challenge were gated on CD44 and CD62L to determine central memory, effector memory, and naïve cell subsets in addition to Thy1.1<sup>+</sup> graft-specific cells and TIGIT expression on each subset was assessed (representative histograms A, summarized in B). CD4<sup>+</sup> T cell subsets were also assessed (representative histograms C, summarized D). Experiments are representative of at least 2 independent experiments, mean ± SEM is shown. Non-parametric Mann-Whitney T tests were performed between groups for B and D, one way ANOVA were performed in F, G, I (\*p<0.05, \*\*p<0.01, \*\*\*p<0.001, \*\*\*\*p<0.0001).

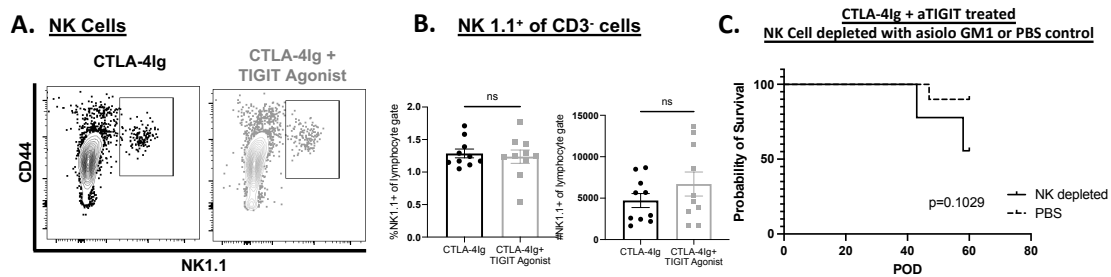

**S3:** NK cells were quantified in the draining lymph nodes (represented in A, summarized B). NK cells were depleted prior to OVA allograft challenge and treatment with CTLA-4lg+ TIGIT agonist. Graft survival was assessed ( $p=0.1029$ , C). Experiments are representative of at least 2 independent experiments, mean  $\pm$  SEM is shown. Non-parametric Mann-Whitney T tests were performed between groups for B and D, one way ANOVA were performed in F, G, I (\* $p<0.05$ , \*\* $p<0.01$ , \*\*\* $p<0.001$ , \*\*\*\* $p<0.0001$ ).

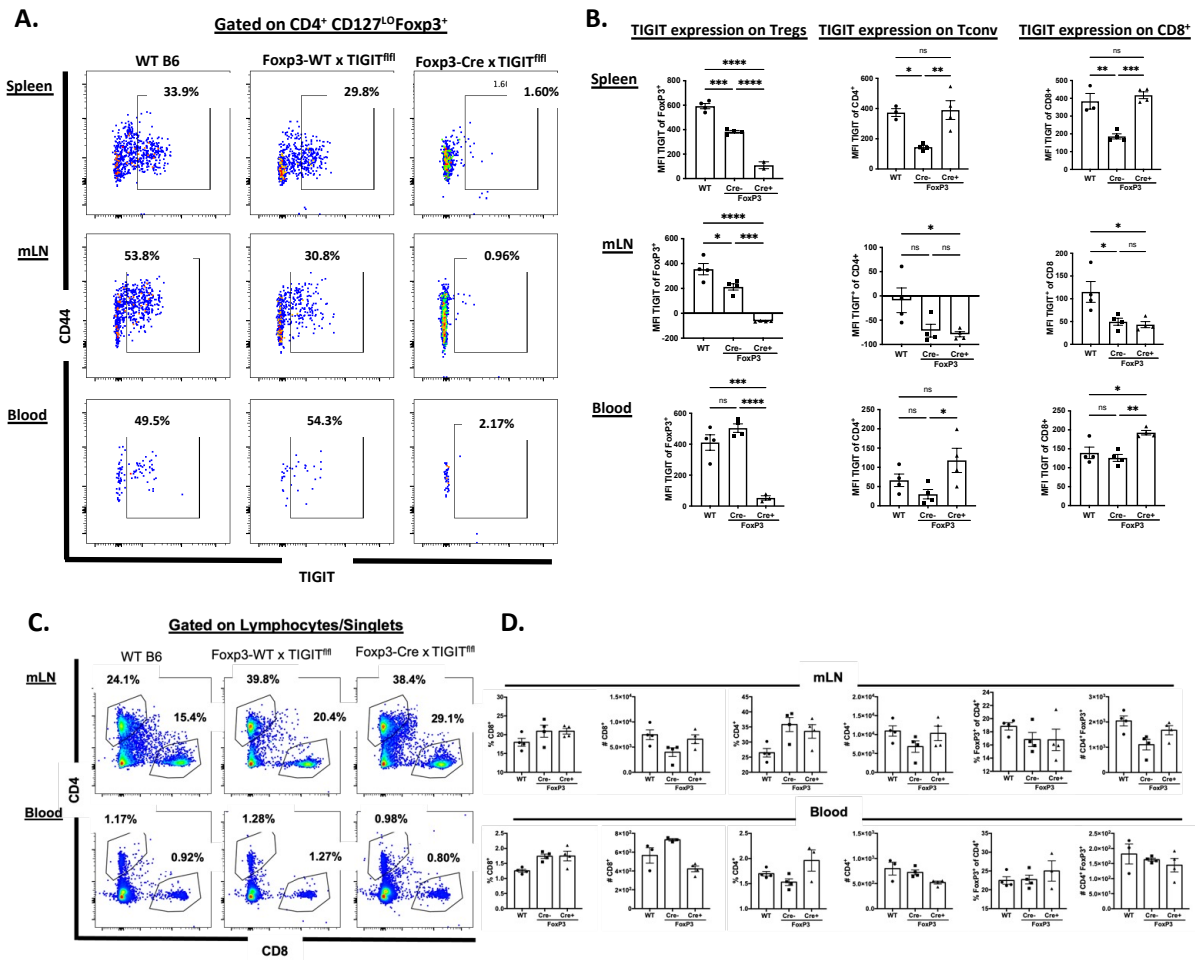

**S4:** (A-B) Assessment of TIGIT expression on cells in WT versus Treg-TIGIT conditional knockout animals. Representative flow cytometry plots of TIGIT expression on Treg in WT B6 mice, Fxp3-WT x TIGIT<sup>fl/fl</sup> mice, and Fxp3-Cre x TIGIT<sup>fl/fl</sup> mice in mesenteric lymph nodes and peripheral blood (A). Comparison summary data of TIGIT expression (MFI) between WT B6 mice, Fxp3-WT x TIGIT<sup>fl/fl</sup> mice, and Fxp3-Cre x TIGIT<sup>fl/fl</sup> mice on Treg, Tconv, or CD8<sup>+</sup> T cells from mesenteric lymph nodes and peripheral blood (B). (C-D) Quantification of lymphocyte populations in WT B6 mice, Fxp3-WT x TIGIT<sup>fl/fl</sup> mice, and Fxp3-Cre x TIGIT<sup>fl/fl</sup> mice in mesenteric lymph nodes and peripheral blood. Representative flow cytometry plot of CD4 and CD8 expression on lymphocytes from the spleen, mesenteric lymph nodes and peripheral blood of WT B6, Fxp3-WT x TIGIT<sup>fl/fl</sup> mice, and Fxp3-Cre x TIGIT<sup>fl/fl</sup> mice (C). The frequency and number of CD8<sup>+</sup>, CD4<sup>+</sup>, and Foxp3<sup>+</sup> Treg for WT B6, Fxp3-WT x TIGIT<sup>fl/fl</sup> mice, and Fxp3-Cre x TIGIT<sup>fl/fl</sup> mice are summarized for mesenteric lymph nodes and blood (D). Experiments are representative of at least 2 independent experiments, mean ± SEM is shown. Non-parametric Mann-Whitney T tests were performed between groups for B and D, one way ANOVA were performed in F, G, I (\*p<0.05, \*\*p<0.01, \*\*\*p<0.001, \*\*\*\*p<0.0001).



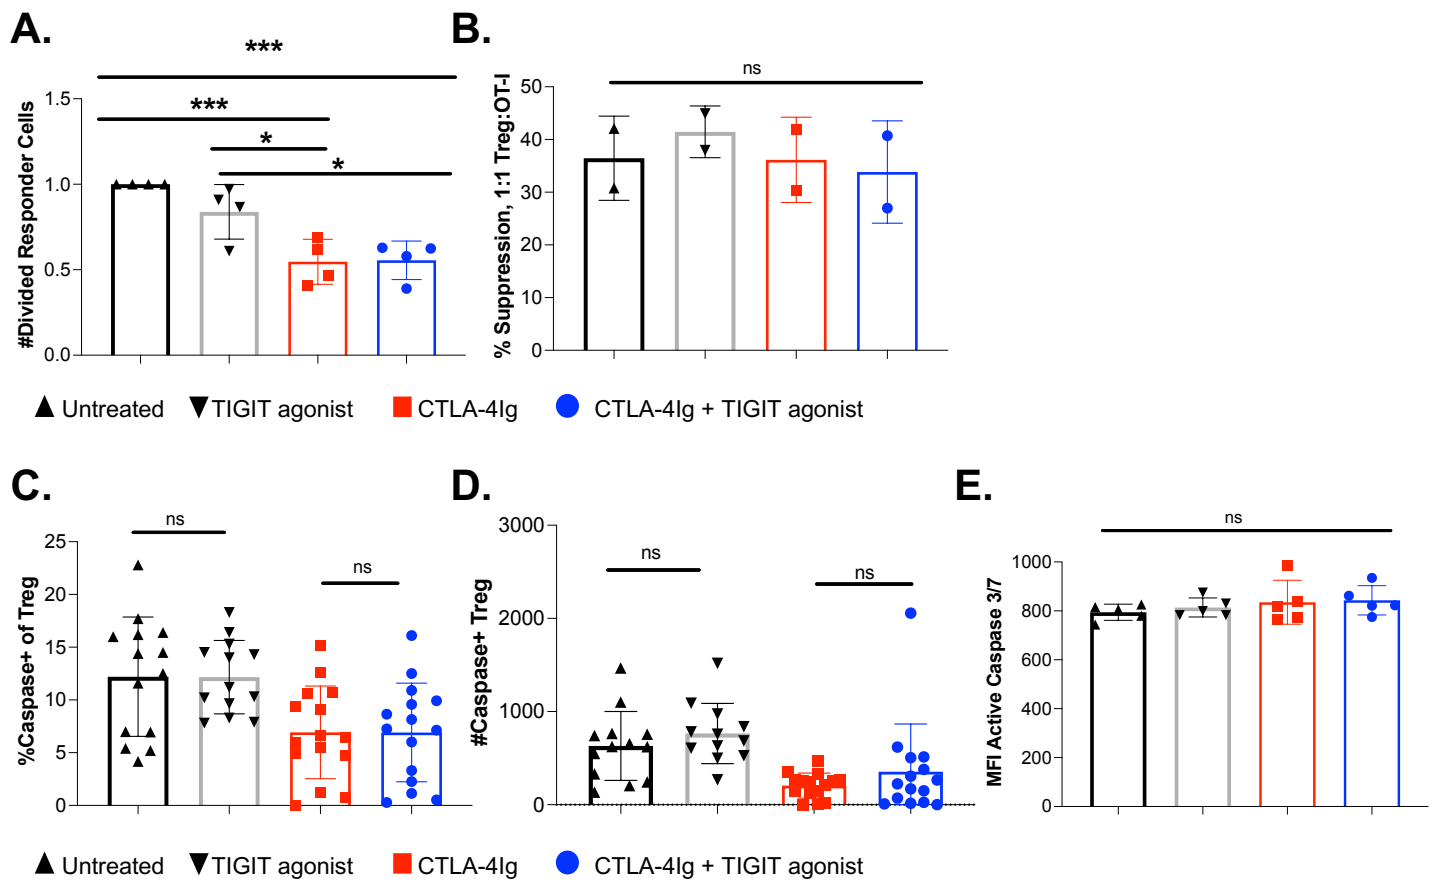

**S6:** CTV labeled OT-I T cells were stimulated with 10nM of SIINFEKL peptide and treated with CTLA-4Ig, TIGIT agonist, or CTLA-4Ig+TIGIT agonist and cultured for 3 days. The number of divided cells were quantified for each treatment condition and compared to untreated controls (A). Stimulated OT-I T cells incubated with the 4 treatments were co-cultured at a 1:1 ratio with Treg and the percent suppression was calculated for untreated, CTLA-4Ig, TIGIT agonist, and CTLA-4Ig+ TIGIT agonist treated cells (B). In the draining lymph nodes of WT C57/BL6 mice the frequency (C), number (D), and MFI (E) of caspase 3/7 activity in Treg was measured. One-way ANOVA analysis with multiple comparisons was performed (\* $p < 0.05$ , \*\* $p < 0.01$ , \*\*\* $p < 0.001$ , \*\*\*\* $p < 0.0001$ ).

**Supplemental Table 1: Antibodies used for flow cytometry**

| <b>Antibody</b> | <b>Clone</b> | <b>Fluorophore</b> | <b>Dilution</b> | <b>Purchased From</b> |
|-----------------|--------------|--------------------|-----------------|-----------------------|
| CD4             | GK1.5        | BUV395<br>APC      | 1:200           | BioLegend             |
| CD8             | 53-6.7       | BUV737<br>BV786    | 1:200           | BioLegend             |
| CD45            |              | BV421<br>Alexa700  | 1:200           | BioLegend             |
| GITR            | DTA-1        | BV605<br>BV711     | 1:100           | BD                    |
| TIGIT           | 1G9          | BV711<br>BV786     | 1:100           | BioLegend             |
| CD25            | 3C7          | PE<br>FITC         | 1:100           | Biolegend             |
| Foxp3           | FJK-16s      | APC<br>PE          | 1:100           | Thermo Fisher         |
| Thy1.1          | OX-7         | PercP              | 1:200           | BioLegend             |
| CD44            | IM7          | BV605              | 1:300           | BioLegend             |
| NK1.1           | PK136        | APC-Cy7            | 1:200           | BioLegend             |
| CXCR3           | CXCR3-173    | BV711<br>FITC      | 1,200           | Biolegend             |
| DNAM            | TX42.1       | BV650              | 1:200           | BioLegend             |
| CD38            | 90           | BV421              | 1:100           | Biolegend             |

|                                          |              |             |        |               |
|------------------------------------------|--------------|-------------|--------|---------------|
| CCR4                                     | 2G12         | PE          | 1:100  | BioLegend     |
| CCR5                                     | J418F1       | PE-Cy7      | 1:100  | BioLegend     |
| CCR7                                     | 4B12         | PE-Dazzle   | 1:100  | Biolegend     |
| VLA4                                     | 9C10 (MFR4.B | BV650       | 1:100  | BD            |
| LFA1                                     | M17/4        | BV786<br>PE | 1:100  | Biolegend     |
| CD69                                     | H1.2F3       | APC-Cy7     | 1:200  | BioLegend     |
| CD62L                                    | MEL-14       | BV510       | 1:200  | BioLegend     |
| CellTrace Violet                         | C34557       |             | 2.5uM  | Thermo Fisher |
| Live/Dead Fixable Aqua                   | L34957       | BV510       | 1:1000 | Thermo Fisher |
| Cell Event Caspase 3/7 Green<br>Flow Kit | C10427       |             | 1:1000 | Thermo Fisher |



**Supplemental Table 2: GO terms for biological processes identified using PANTHER and GORILLA**

| GO term    | Description                                                            | P-value  | FDR q-value | Enrichment (N, B, n, b)   | Genes                                                                                                                                                                             |
|------------|------------------------------------------------------------------------|----------|-------------|---------------------------|-----------------------------------------------------------------------------------------------------------------------------------------------------------------------------------|
| GO:0045581 | negative regulation of T cell differentiation                          | 1.17E-05 | 1.57E-01    | 27.86<br>(10566,37,41,4)  | Foxp3 - forkhead box p3<br>Il2 - interleukin 2<br>Socs5 - suppressor of cytokine signaling 5<br>Prdx2 - peroxiredoxin 2                                                           |
| GO:0050868 | negative regulation of T cell activation                               | 1.89E-05 | 1.26E-01    | 14.98<br>(10566,86,41,5)  | Foxp3 - forkhead box p3<br>Il2 - interleukin 2<br>Socs5 - suppressor of cytokine signaling 5<br>Tigit - t cell immunoreceptor with ig and itim domains<br>Prdx2 - peroxiredoxin 2 |
| GO:0045620 | negative regulation of lymphocyte differentiation                      | 2.16E-05 | 9.63E-02    | 23.97<br>(10566,43,41,4)  | Foxp3 - forkhead box p3<br>Il2 - interleukin 2<br>Socs5 - suppressor of cytokine signaling 5<br>Prdx2 - peroxiredoxin 2                                                           |
| GO:1903038 | negative regulation of leukocyte cell-cell adhesion                    | 2.62E-05 | 8.78E-02    | 14.01<br>(10566,92,41,5)  | Foxp3 - forkhead box p3<br>Il2 - interleukin 2<br>Socs5 - suppressor of cytokine signaling 5<br>Tigit - t cell immunoreceptor with ig and itim domains<br>Prdx2 - peroxiredoxin 2 |
| GO:0045623 | negative regulation of T-helper cell differentiation                   | 3.55E-05 | 9.50E-02    | 45.48<br>(10566,17,41,3)  | Foxp3 - forkhead box p3<br>Il2 - interleukin 2<br>Socs5 - suppressor of cytokine signaling 5                                                                                      |
| GO:0043371 | negative regulation of CD4-positive, alpha-beta T cell differentiation | 5.91E-05 | 1.32E-01    | 38.66<br>(10566,20,41,3)  | Foxp3 - forkhead box p3<br>Il2 - interleukin 2<br>Socs5 - suppressor of cytokine signaling 5                                                                                      |
| GO:0002637 | regulation of immunoglobulin production                                | 6.19E-05 | 1.18E-01    | 18.41<br>(10566,56,41,4)  | Foxp3 - forkhead box p3<br>Il2 - interleukin 2<br>Ighm - immunoglobulin heavy constant mu<br>Tnfrsf4 - tumor necrosis factor receptor superfamily, member 4                       |
| GO:0051250 | negative regulation of lymphocyte activation                           | 6.21E-05 | 1.04E-01    | 11.71<br>(10566,110,41,5) | Foxp3 - forkhead box p3<br>Il2 - interleukin 2<br>Socs5 - suppressor of cytokine signaling 5<br>Tigit - t cell immunoreceptor with ig and itim domains<br>Prdx2 - peroxiredoxin 2 |
| GO:0046639 | negative regulation of alpha-beta T cell differentiation               | 6.87E-05 | 1.02E-01    | 36.82<br>(10566,21,41,3)  | Foxp3 - forkhead box p3<br>Il2 - interleukin 2<br>Socs5 - suppressor of cytokine signaling 5                                                                                      |
